# Supplementary material for: Transcriptional profiling in C. elegans suggests DNA damage dependent apoptosis as an ancient function of the p53 family
Source: PubMed Central journal article supplement (PMC2491638; doi:10.1186/1471-2164-9-334), 2008-07-15

*Wild type*

*cep-1(gk138)*

*cep-1(lg12501)*

CEP-1

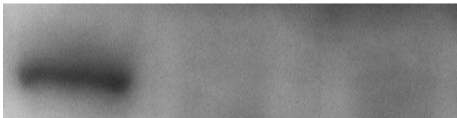

alpha-tubulin

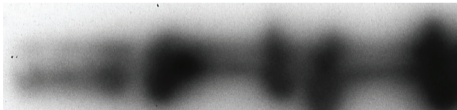

Supplement: 1471-2164-9-334-S5.pdf [file 1471-2164-9-334-S5.pdf]
